# Supplementary material for: Iron catalyzed oxidation of benzylic alcohols to benzoic acids
Source: Royal Society of Chemistry journal article supplement (doi:10.1039/c8dt00819a), 2018-01-01
Supplement: c8dt00819a1.pdf [file c8dt00819a1.pdf]

Supporting information for:

## Iron catalyzed oxidation of benzylic alcohols to benzoic acids

B. Stanje,<sup>a</sup> P. Traar,<sup>a</sup> J. A. Schachner,<sup>a\*</sup> F. Belaj,<sup>a</sup> N. C. Mösch-Zanetti<sup>a</sup>

Table S 1. Crystal data and structure refinement of complexes **1** and **1a**

|                                                      | <b>1</b>                                                          | <b>1a</b>                                                                     |
|------------------------------------------------------|-------------------------------------------------------------------|-------------------------------------------------------------------------------|
| empirical formula                                    | C <sub>20</sub> H <sub>18</sub> ClFeN <sub>4</sub> O <sub>2</sub> | C <sub>40</sub> H <sub>36</sub> Fe <sub>2</sub> N <sub>8</sub> O <sub>5</sub> |
| formula weight                                       | 437.68                                                            | 820.47                                                                        |
| crystal description                                  | plate, red                                                        | block, red                                                                    |
| crystal size (mm)                                    | 0.30 x 0.25 x 0.11mm                                              | 0.28 x 0.21 x 0.17                                                            |
| crystal system, space group                          | monoclinic, <i>P</i> 2 <sub>1</sub> / <i>c</i>                    | orthorhombic, <i>P</i> b c a                                                  |
| Unit cell dimensions, a (Å)                          | 14.1475(6)                                                        | 18.4514(10)                                                                   |
| b (Å)                                                | 11.7295(5)                                                        | 19.5777(11)                                                                   |
| c (Å)                                                | 11.9893(5)                                                        | 20.1490(11)                                                                   |
| α (°)                                                | 90                                                                | 90                                                                            |
| β (°)                                                | 108.0920(10)                                                      | 90                                                                            |
| γ (°)                                                | 90                                                                | 90                                                                            |
| volume (Å <sup>3</sup> )                             | 1891.18(14)                                                       | 7278.5(7)                                                                     |
| Z, Calculated density (gcm <sup>-3</sup> )           | 4, 1.537                                                          | 8, 1.497                                                                      |
| F(000)                                               | 900                                                               | 3392                                                                          |
| linear absorption coefficient μ (mm <sup>-1</sup> )  | 0.963                                                             | 0.855                                                                         |
| absorption correction                                |                                                                   | semi-empirical from equivalents                                               |
| temperature (K)                                      | 100                                                               | 100                                                                           |
| wavelength (MoKα) (Å)                                | 0.71073                                                           | 0.71073                                                                       |
| theta range for data collection (°)                  | 2.30 to 30.00°                                                    | 2.02 to 30.00                                                                 |
| limiting indices                                     | -19 ≤ h ≤ 19<br>-14 ≤ k ≤ 16<br>-12 ≤ l ≤ 16                      | -25 ≤ h ≤ 19<br>-27 ≤ k ≤ 14<br>-27 ≤ l ≤ 28                                  |
| reflections collected / unique                       | 25391 / 5517                                                      | 31306 / 10603                                                                 |
| reflections with I > 2σ(I)                           | 5072                                                              | 7961                                                                          |
| R(int), R(sigma)                                     | 0.0255, 0.0179                                                    | 0.0286, 0.0349                                                                |
| completeness to theta max. (%)                       | 100                                                               | 99.9                                                                          |
| refinement method                                    |                                                                   | full matrix least squares on F <sup>2</sup>                                   |
| data / restraints / parameters                       | 5517 / 261 / 0                                                    | 10603 / 512 / 0                                                               |
| goodness-of-fit on F <sup>2</sup>                    | 1.038                                                             | 1.011                                                                         |
| final R1 <sup>a)</sup> wR2 <sup>b)</sup> [I > 2σ(I)] | R1 = 0.0254, wR2 = 0.0721                                         | R1 = 0.0355, wR2 = 0.0823                                                     |
| R indices (all data)                                 | R1 = 0.0284, wR2 = 0.0747                                         | R1 = 0.0566, wR2 = 0.0910                                                     |
| largest diff. peak and hole (eÅ <sup>-3</sup> )      | 0.543 and -0.337                                                  | 0.416 and -0.455                                                              |
| CCDC deposition no.                                  | 1048055                                                           | 1048056                                                                       |

<sup>a)</sup>  $R1 = \frac{\sum |F_o - |F_c||}{\sum |F_o|}$  <sup>b)</sup>  $wR2 = \left\{ \frac{\sum [w(F_o^2 - F_c^2)]^2}{\sum [w(F_o^2)]} \right\}^{1/2}$

**Crystal Structure Determination of 1.** All the measurements were performed using graphite-monochromatized Mo  $K_{\alpha}$  radiation at 100K:  $C_{20}H_{18}ClFeN_4O_2$ ,  $M_r$  437.68, monoclinic, space group  $P 2_1/c$ ,  $a = 14.1475(6)\text{\AA}$ ,  $b = 11.7295(5)\text{\AA}$ ,  $c = 11.9893(5)\text{\AA}$ ,  $\beta = 108.0920(10)^\circ$ ,  $V = 1891.18(14)\text{\AA}^3$ ,  $Z = 4$ ,  $d_{\text{calc}} = 1.537\text{g cm}^{-3}$ ,  $\mu = 0.963\text{mm}^{-1}$ . A total of 25391 reflections were collected ( $\Theta_{\text{max}} = 30.0^\circ$ ), from which 5517 were unique ( $R_{\text{int}} = 0.0255$ ), with 5072 having  $I > 2\sigma(I)$ . The structure was solved by direct methods (SHELXS-97)<sup>1</sup> and refined by full-matrix least-squares techniques against  $F^2$  (SHELXL-2014/6)<sup>1</sup>. The non-hydrogen atoms were refined with anisotropic displacement parameters without any constraints. The H atoms of the pyrazole and of the phenyl rings were put at the external bisectors of the C–C–X angles at C–H distance of  $0.95\text{\AA}$  and one common isotropic displacement parameter was refined for the H atoms of the same ring. The H atoms of the methyl groups were refined with common isotropic displacement parameters for the H atoms of the same group and idealized geometries with tetrahedral angles, enabling rotation around the N–C bond, and C–H distances of  $0.98\text{\AA}$ . For 261 parameters final  $R$  indices of  $R1 = 0.0254$  and  $wR^2 = 0.0747$  (GOF = 1.039) were obtained. The largest peak in a difference Fourier map was  $0.543\text{e}\text{\AA}^{-3}$ .

**Crystal Structure.** The crystal structure analysis of **1** confirmed the compound as chloro-bis[2-(1-methyl-*1H*-pyrazol-3-yl)phenolato-N,O]-iron(III). All atoms lie on general positions. The complex shows a trigonal bipyramidal coordination of the iron atom (Figure S 1) with the N atoms in axial positions [ $N12\text{--}Fe1\text{--}N32$   $170.68(4)^\circ$ ] and small deviations from ideal geometry [ $O41\text{--}Fe1\text{--}O21$   $125.49(4)^\circ$ ,  $O21\text{--}Fe1\text{--}Cl1$   $119.59(3)^\circ$ ,  $O41\text{--}Fe1\text{--}Cl1$   $114.91(3)^\circ$ ]. In the two ligands the planar pyrazole rings are rotated by  $6.56(6)^\circ$  and  $3.08(6)^\circ$ , resp., to the phenyl rings.

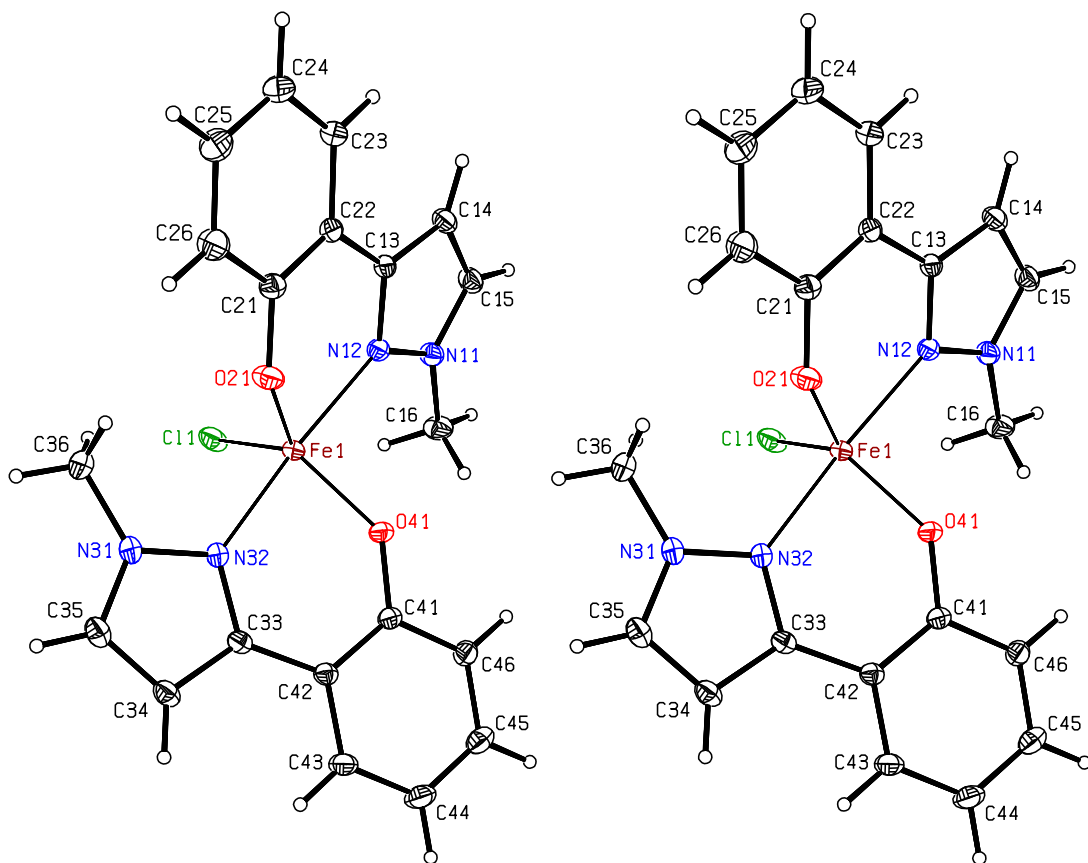

Figure S 1. Stereoscopic ORTEP<sup>2</sup> plot of **1** showing the atomic numbering scheme. The probability ellipsoids are drawn at the 50% probability level. The H atoms are drawn with arbitrary radii.

Table S 2. Selected bond lengths [Å] and angles [°] for **1**.

|                   |            |                         |             |
|-------------------|------------|-------------------------|-------------|
| Fe(1)-O(21)       | 1.8630(8)  | O(21)-Fe(1)-N(32)       | 89.41(4)    |
| Fe(1)-O(41)       | 1.8583(8)  | N(12)-Fe(1)-Cl(1)       | 94.56(3)    |
| Fe(1)-N(12)       | 2.1201(9)  | N(32)-Fe(1)-Cl(1)       | 94.73(3)    |
| Fe(1)-N(32)       | 2.1309(9)  | C(15)-N(11)-N(12)       | 111.08(9)   |
| Fe(1)-Cl(1)       | 2.2703(3)  | C(15)-N(11)-C(16)       | 126.39(10)  |
| N(11)-C(15)       | 1.3430(14) | N(12)-N(11)-C(16)       | 122.46(9)   |
| N(11)-N(12)       | 1.3575(13) | C(13)-N(12)-N(11)       | 106.01(9)   |
| N(11)-C(16)       | 1.4523(14) | C(13)-N(12)-Fe(1)       | 127.15(7)   |
| N(12)-C(13)       | 1.3545(13) | N(11)-N(12)-Fe(1)       | 126.73(7)   |
| C(13)-C(14)       | 1.4069(15) | C(21)-O(21)-Fe(1)       | 135.11(8)   |
| C(14)-C(15)       | 1.3750(16) | C(35)-N(31)-N(32)       | 111.21(10)  |
| O(21)-C(21)       | 1.3379(13) | C(35)-N(31)-C(36)       | 126.68(10)  |
| N(31)-C(35)       | 1.3408(15) | N(32)-N(31)-C(36)       | 122.10(10)  |
| N(31)-N(32)       | 1.3584(13) | C(33)-N(32)-N(31)       | 105.85(9)   |
| N(31)-C(36)       | 1.4509(16) | C(33)-N(32)-Fe(1)       | 127.79(7)   |
| N(32)-C(33)       | 1.3537(14) | N(31)-N(32)-Fe(1)       | 126.20(7)   |
| C(33)-C(34)       | 1.4062(15) | C(41)-O(41)-Fe(1)       | 137.89(7)   |
| C(34)-C(35)       | 1.3776(17) |                         |             |
| O(41)-C(41)       | 1.3349(12) | C(15)-N(11)-N(12)-Fe(1) | 176.40(8)   |
|                   |            | C(16)-N(11)-N(12)-Fe(1) | -0.76(15)   |
| N(12)-Fe(1)-N(32) | 170.68(4)  | Fe(1)-N(12)-C(13)-C(14) | -176.49(7)  |
| O(41)-Fe(1)-O(21) | 125.49(4)  | Fe(1)-N(12)-C(13)-C(22) | 1.60(15)    |
| O(21)-Fe(1)-Cl(1) | 119.59(3)  | C(15)-N(11)-N(12)-C(13) | -0.04(12)   |
| O(41)-Fe(1)-Cl(1) | 114.91(3)  | C(16)-N(11)-N(12)-C(13) | -177.20(10) |
| O(41)-Fe(1)-N(12) | 91.51(4)   | N(11)-N(12)-C(13)-C(14) | -0.07(12)   |
| O(21)-Fe(1)-N(12) | 85.45(4)   | N(12)-C(13)-C(14)-C(15) | 0.15(13)    |
| O(41)-Fe(1)-N(32) | 85.15(4)   | C(13)-C(14)-C(15)-N(11) | -0.16(13)   |

C(14)-C(15)-N(11)-N(12)0.13(13)  
Fe(1)-O(21)-C(21)-C(22)-25.02(18)  
Fe(1)-O(21)-C(21)-C(26)155.66(10)  
C(35)-N(31)-N(32)-Fe(1)175.59(8)  
C(36)-N(31)-N(32)-Fe(1)-3.35(16)  
Fe(1)-N(32)-C(33)-C(34)-175.51(8)  
Fe(1)-N(32)-C(33)-C(42)3.27(15)  
C(35)-N(31)-N(32)-C(33)-0.16(13)  
N(31)-N(32)-C(33)-C(34)0.15(12)  
N(32)-C(33)-C(34)-C(35)-0.09(13)  
C(33)-C(34)-C(35)-N(31)-0.01(13)  
C(34)-C(35)-N(31)-N(32)0.10(14)  
Fe(1)-O(41)-C(41)-C(42)-13.71(17)  
Fe(1)-O(41)-C(41)-C(46)167.81(8)

**Crystal Structure Determination of 1a.** All the measurements were performed using graphite-monochromatized Mo  $K_{\alpha}$  radiation at 100K:  $C_{40}H_{36}Fe_2N_8O_5$ ,  $M_r$  820.47, orthorhombic, space group  $Pbc_a$ ,  $a = 18.4514(10)\text{\AA}$ ,  $b = 19.5777(11)\text{\AA}$ ,  $c = 20.1490(11)\text{\AA}$ ,  $V = 7278.5(7)\text{\AA}^3$ ,  $Z = 8$ ,  $d_{\text{calc}} = 1.497\text{g cm}^{-3}$ ,  $\mu = 0.855\text{mm}^{-1}$ . A total of 31306 reflections were collected ( $\Theta_{\text{max}} = 30.0^\circ$ ), from which 10603 were unique ( $R_{\text{int}} = 0.0286$ ), with 7956 having  $I > 2\sigma(I)$ . The structure was solved by direct methods (SHELXS-97)<sup>1</sup> and refined by full-matrix least-squares techniques against  $F^2$  (SHELXL-2014/6)<sup>1</sup>. The non-hydrogen atoms were refined with anisotropic displacement parameters without any constraints. The H atoms of the phenyl rings as well as those of the pyrazole rings were put at the external bisectors of the C–C angles at C–H distances of  $0.95\text{\AA}$  and common isotropic displacement parameters were refined for the H atoms of the same ring. The H atoms of the methyl groups were refined with common isotropic displacement parameters for the H atoms of the same group and idealized geometries with tetrahedral angles, enabling rotation around the N–C bond, and C–H distances of  $0.98\text{\AA}$ . For 512 parameters final  $R$  indices of  $R1 = 0.0355$  and  $wR^2 = 0.0910$  ( $\text{GOF} = 1.010$ ) were obtained. The largest peak in a difference Fourier map was  $0.416\text{e}\text{\AA}^{-3}$ .

**Crystal Structure.** The crystal structure analysis of **1a** confirmed the compound as ( $\mu_2$ -oxo)-bis(bis[2-(1-methyl-*IH*-pyrazol-3-yl)phenolato-N,O]-iron(III)). The complex shows approx.  $D_2$  symmetry, but all atoms lie on general positions (Figure S 2). The Fe atoms have trigonal-bipyramidal surroundings [ $N12\text{--}Fe1\text{--}N32$   $172.76(5)\text{\AA}$ ,  $N52\text{--}Fe2\text{--}N72$   $172.41(5)\text{\AA}$ ] and are connected by a linear O bridge [ $O1\text{--}Fe1$   $1.7898(11)\text{\AA}$ ,  $O1\text{--}Fe2$   $1.7893(11)\text{\AA}$ ;  $Fe1\text{--}O1\text{--}Fe2$   $179.86(9)^\circ$ ]. In the four ligands the planar pyrazole rings enclose angles of  $4.21(9)^\circ$ - $8.54(6)^\circ$  with the phenyl rings.

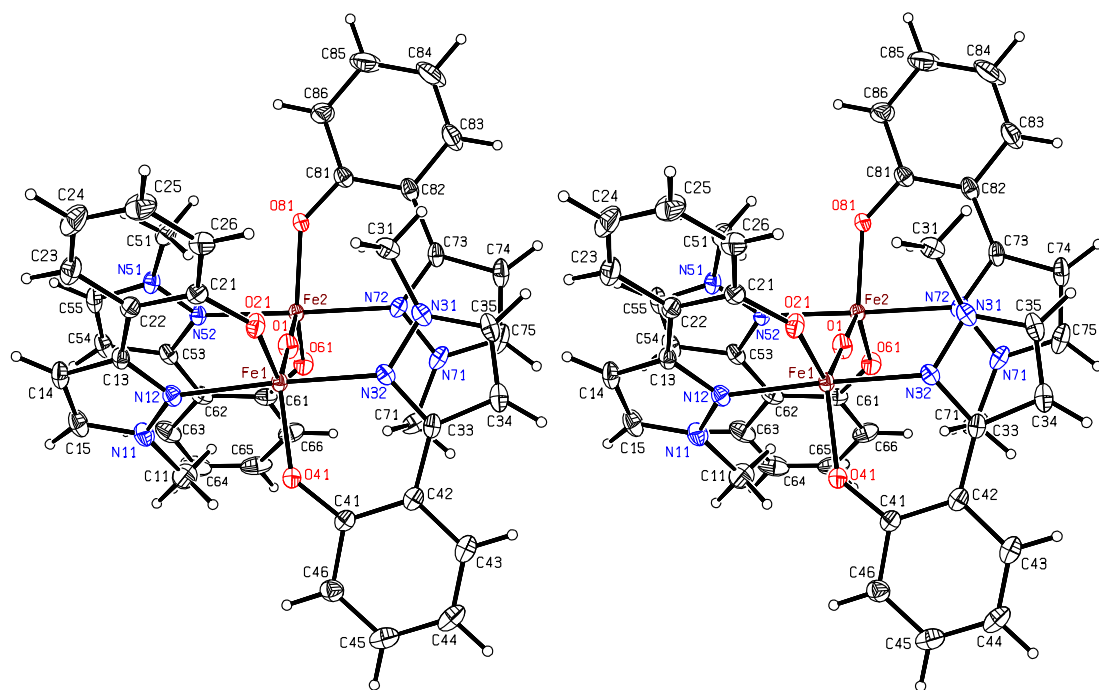

Figure S 2. Stereoscopic ORTEP<sup>2</sup> plot of **1a** showing the atomic numbering scheme. The probability ellipsoids are drawn at the 50% probability level. The H atoms are drawn with arbitrary radii.

Table S 3. Selected bond lengths [Å] and angles [°] for **1a**.

|                   |            |                         |             |
|-------------------|------------|-------------------------|-------------|
| O(1)-Fe(1)        | 1.7898(11) | N(32)-N(31)-C(31)       | 121.13(13)  |
| O(1)-Fe(2)        | 1.7893(11) | C(33)-N(32)-N(31)       | 106.24(12)  |
| Fe(1)-O(21)       | 1.9098(11) | C(33)-N(32)-Fe(1)       | 127.90(10)  |
| Fe(1)-O(41)       | 1.8986(11) | N(31)-N(32)-Fe(1)       | 124.97(10)  |
| Fe(1)-N(12)       | 2.1531(13) | C(41)-O(41)-Fe(1)       | 136.10(10)  |
| Fe(1)-N(32)       | 2.1246(13) | N(52)-Fe(2)-N(72)       | 172.41(5)   |
| N(11)-C(15)       | 1.346(2)   | O(1)-Fe(2)-O(61)        | 121.88(5)   |
| N(11)-N(12)       | 1.3625(18) | O(1)-Fe(2)-O(81)        | 118.62(5)   |
| N(12)-C(13)       | 1.3519(19) | O(61)-Fe(2)-O(81)       | 119.45(5)   |
| C(13)-C(14)       | 1.411(2)   | O(1)-Fe(2)-N(52)        | 93.61(5)    |
| C(14)-C(15)       | 1.370(3)   | O(61)-Fe(2)-N(52)       | 85.31(5)    |
| O(21)-C(21)       | 1.3291(18) | O(81)-Fe(2)-N(52)       | 93.30(5)    |
| N(31)-C(35)       | 1.347(2)   | O(1)-Fe(2)-N(72)        | 93.82(5)    |
| N(31)-N(32)       | 1.3653(17) | O(61)-Fe(2)-N(72)       | 89.45(5)    |
| N(32)-C(33)       | 1.351(2)   | O(81)-Fe(2)-N(72)       | 84.48(5)    |
| C(33)-C(34)       | 1.410(2)   | C(55)-N(51)-N(52)       | 110.81(14)  |
| C(34)-C(35)       | 1.373(2)   | C(55)-N(51)-C(51)       | 127.38(14)  |
| O(41)-C(41)       | 1.3354(18) | N(52)-N(51)-C(51)       | 121.80(13)  |
| Fe(2)-O(61)       | 1.8993(11) | C(53)-N(52)-N(51)       | 106.00(12)  |
| Fe(2)-O(81)       | 1.9094(11) | C(53)-N(52)-Fe(2)       | 128.13(11)  |
| Fe(2)-N(52)       | 2.1273(13) | N(51)-N(52)-Fe(2)       | 125.31(10)  |
| Fe(2)-N(72)       | 2.1580(13) | C(61)-O(61)-Fe(2)       | 135.93(10)  |
| N(51)-C(55)       | 1.344(2)   | C(75)-N(71)-N(72)       | 111.21(14)  |
| N(51)-N(52)       | 1.3635(17) | C(75)-N(71)-C(71)       | 127.73(15)  |
| N(52)-C(53)       | 1.356(2)   | N(72)-N(71)-C(71)       | 120.95(14)  |
| C(53)-C(54)       | 1.411(2)   | C(73)-N(72)-N(71)       | 105.71(13)  |
| C(54)-C(55)       | 1.377(2)   | C(73)-N(72)-Fe(2)       | 128.47(10)  |
| O(61)-C(61)       | 1.3394(19) | N(71)-N(72)-Fe(2)       | 125.42(10)  |
| N(71)-C(75)       | 1.342(2)   | C(81)-O(81)-Fe(2)       | 135.69(10)  |
| N(71)-N(72)       | 1.3626(18) | C(15)-N(11)-N(12)-Fe(1) | -169.00(11) |
| N(72)-C(73)       | 1.352(2)   | C(11)-N(11)-N(12)-Fe(1) | 7.6(2)      |
| C(73)-C(74)       | 1.411(2)   | Fe(1)-N(12)-C(13)-C(14) | 168.30(11)  |
| C(74)-C(75)       | 1.371(3)   | Fe(1)-N(12)-C(13)-C(22) | -13.1(2)    |
| O(81)-C(81)       | 1.3316(18) | Fe(1)-O(21)-C(21)-C(22) | 10.9(2)     |
| Fe(2)-O(1)-Fe(1)  | 179.86(9)  | Fe(1)-O(21)-C(21)-C(26) | -171.16(11) |
| N(32)-Fe(1)-N(12) | 172.76(5)  | C(35)-N(31)-N(32)-Fe(1) | -170.80(11) |
| O(1)-Fe(1)-O(41)  | 118.60(5)  | C(31)-N(31)-N(32)-Fe(1) | 9.24(19)    |
| O(1)-Fe(1)-O(21)  | 120.79(5)  | Fe(1)-N(32)-C(33)-C(34) | 170.25(11)  |
| O(41)-Fe(1)-O(21) | 120.59(5)  | Fe(1)-N(32)-C(33)-C(42) | -8.5(2)     |
| O(1)-Fe(1)-N(32)  | 93.62(5)   | Fe(1)-O(41)-C(41)-C(42) | 13.4(2)     |
| O(41)-Fe(1)-N(32) | 85.60(5)   | Fe(1)-O(41)-C(41)-C(46) | -167.18(12) |
| O(21)-Fe(1)-N(32) | 91.83(5)   | C(55)-N(51)-N(52)-Fe(2) | -173.29(11) |
| O(1)-Fe(1)-N(12)  | 93.62(5)   | C(51)-N(51)-N(52)-Fe(2) | 6.4(2)      |
| O(41)-Fe(1)-N(12) | 90.76(5)   | Fe(2)-N(52)-C(53)-C(54) | 172.62(11)  |
| O(21)-Fe(1)-N(12) | 84.63(5)   | Fe(2)-N(52)-C(53)-C(62) | -8.1(2)     |
| C(15)-N(11)-N(12) | 110.94(14) | Fe(2)-O(61)-C(61)-C(62) | 10.3(2)     |
| C(15)-N(11)-C(11) | 128.34(15) | Fe(2)-O(61)-C(61)-C(66) | -171.22(12) |
| N(12)-N(11)-C(11) | 120.62(13) | C(75)-N(71)-N(72)-Fe(2) | -173.37(11) |
| C(13)-N(12)-N(11) | 105.89(13) | C(71)-N(71)-N(72)-Fe(2) | 3.0(2)      |
| C(13)-N(12)-Fe(1) | 127.68(10) | Fe(2)-N(72)-C(73)-C(74) | 173.18(11)  |
| N(11)-N(12)-Fe(1) | 125.32(10) | Fe(2)-N(72)-C(73)-C(82) | -3.5(2)     |
| C(21)-O(21)-Fe(1) | 136.38(10) | Fe(2)-O(81)-C(81)-C(82) | 23.4(2)     |
| C(35)-N(31)-N(32) | 110.65(13) | Fe(2)-O(81)-C(81)-C(86) | -157.61(13) |
| C(35)-N(31)-C(31) | 128.22(14) |                         |             |



## References.

1. G. M. Sheldrick, *Acta Crystallogr. A, Found. Crystallogr.*, 2008, **64**, 112.
2. Michael N. Burnett and C. K. Johnson, *ORTEP-III: Oak Ridge Thermal Ellipsoid Plot Program for Crystal Structure Illustrations*, Oak Ridge National Laboratory Report ORNL-6895, Oak Ridge, 1996.
